# Supplementary material
Source: publisher figshare collection journal article supplement (https://asha.figshare.com/ndownloader/files/38403380)
Supplement: Supplementary file 1 [file 38403380]

## Supplemental Material S1. Stimuli.

### 1. Phonological/articulatory level – Multisyllabic nonword

|                |                    |
|----------------|--------------------|
| thasa /'ðasa/  | zathasa /'zaθasa/  |
| thaza /'ðaza/  | thashaza /'ðaʃaza/ |
| chava /'tʃava/ | jachava /'dʒaʃava/ |
| zatha /'zaθa/  | vazatha /'vazaθa/  |

String example: /'ðasa'zaθasa'zaθasa'ðasa/

### 2. Lexical level – low frequency, late acquired words

|           |          |          |           |
|-----------|----------|----------|-----------|
| musician  | tulip    | gorilla  | cement    |
| parrot    | builder  | carnival | minister  |
| lilacs    | chipmunk | pianist  | celery    |
| crocodile | trophy   | sparrow  | carpenter |
| ginger    | squirrel | gardener | buffalo   |
| enemy     | lizard   | balcony  | camel     |

### 3. Syntactic level – center-embedded, bound relative clause

The car that we drove behind moved very slowly.

The ball that the boy played with looked dirty.

The small child that he fought for is doing fine.

The dog that the girl laughed at licked his paw.

The class that she spoke about started last week.

The wedding that he cried during started at one.
